# Supplementary material
Source: bioRxiv or medRxiv preprint supplement (https://medrxiv.org/highwire/filestream/85892/field_highwire_adjunct_files/1/2020.06.12.20129114-2.pdf)
Supplement: Supplementary file [file 2020.06.12.20129114-2.pdf]

# Study Protocol

## How to better communicate exponential growth of infectious diseases

Martin Schonger\* and Daniela Sele<sup>§</sup>

[mschonger@ethz.ch](mailto:mschonger@ethz.ch) and [daniela.sele@gess.ethz.ch](mailto:daniela.sele@gess.ethz.ch),

\*ETH Zurich and Hochschule Luzern, Switzerland; <sup>§</sup>ETH Zurich, Switzerland

### Study design

The study uses a between subjects design.

Participants are randomly assigned with equal probability to one of the four treatment groups A1, A2, B1 and B2. Groups differ in terms of the framing of the three questions on NPIs/mitigation, high exponential growth and low exponential growth:

|                                                                    | Growth given in growth rate | Growth given in doubling time in days |
|--------------------------------------------------------------------|-----------------------------|---------------------------------------|
| Asks for number of infected people after a number of days          | Group A1                    | Group A2                              |
| Asks for number of days until a given number of people is infected | Group B1                    | Group B2                              |

The initial number of infected people is always given.

### Randomization

Participants are randomly assigned with equal probability to one of the four treatment groups. The randomization is not done by the researchers but by the ETH Decision Sciences Laboratory ([www.descil.ethz.ch](http://www.descil.ethz.ch)), who execute the study. The randomization is done using the Qualtrics Survey Platform's randomization tool.

Within groups, the order of questions is randomized according to the following system. The randomization is such that the 4 orders and thus the subgroups are of equal size in expectation. Subgroups are denoted by ...-1, ...-2, ...-3, ...-4.

| Subgroup            | Question order                                                                                                                                  |
|---------------------|-------------------------------------------------------------------------------------------------------------------------------------------------|
| A1-1,A2-1,B1-1,B2-1 | 1. Question with high growth rate/low doubling time<br>2. Question with low growth rate/high doubling time<br>3. Question on mitigation measure |
| A1-2,A2-2,B1-2,B2-2 | 1. Question with low growth rate/high doubling time<br>2. Question with high growth rate/low doubling time<br>3. Question on mitigation measure |
| A1-3,A2-3,B1-3,B2-3 | 1. Question on mitigation measure<br>2. Question with high growth rate/low doubling time<br>3. Question with low growth rate/high doubling time |
| A1-4,A2-4,B1-4,B2-4 | 1. Question on mitigation measure<br>2. Question with low growth rate/high doubling time<br>3. Question with high growth rate/low doubling time |

## Human Subjects

### Ethics Approval:

Obtained from the ETH Zurich Ethics Commission prior to the study (Number 2020-N-36).

### Population:

Participants sign up to the joint subject pool of the University of Zurich and ETH Zurich, UAST ([www.uast.uzh.ch](http://www.uast.uzh.ch)). At this point they are first briefed about their general rights and the voluntariness of participation in any study they may subsequently be invited to join.

### Recruitment:

Participants are invited by email sent from UAST to participate in the study. They sign up to participate via a link in this email.

Informed consent is obtained from participants.

### Data protection:

The names, emails and payment information of participants are only available to the ETH Zurich DeSciL administration, and not to the researchers.

## Data collection procedures

### Payment for participation:

Participants are paid a flat fee of 10 CHF for participating via bank transfer.

### Inclusion and exclusion rules:

Participants must

- speak German
- be born on or after January 1980 and be at minimum 18 years of age
- have a maximum of 3 previous non-shows at a study using the UAST pool
- be students in a Non-STEM subject (STEM students are excluded via the UAST filtering rule)

### Study timeline:

The study takes place in March 2020 in Switzerland. The country is under severe government restrictions due to the Corona virus pandemic. The study topic is closely related to this. Results may differ under normal circumstances.

## Sample size

We schedule three sessions (March 25 at 5 PM, March 26 at 10 AM, March 26 at 5 PM). Up to 165 participants can register to each session.

If we have less than 80 participants in any one of the four treatment groups A1 to B2, additional participants will be recruited.

Our sample size is based on having at least 100 participants per group, an arbitrary number.

#### Blinding

The participants do not know nor that there are treatment groups, let alone the treatment group to which they are assigned.

None of the personnel involved in the study interact directly with the participants.

Researchers who analyze the data collected from the study are aware of the treatment applied. In case where participant answers are unclear/non-machine interpretable/not unambiguously interpretable, a research assistant blind to the condition codes these answers (if appropriate as n/a).

Our sample size is based on having at least 100 participants per group, an arbitrary number.

#### Data exclusion

We only invite students in non-STEM subjects. If a participant indicates in the demographic questions that he or she is reading a STEM subject, this participant is excluded from the study.

#### Missing data

If there is no entry for the unit of an answer, it will be assumed that the answer is using the units of the question.

### Ausbreitung einer ansteckenden Krankheit

In einem Land haben sich bisher 974 Menschen angesteckt. Die Zahl der angesteckten Menschen steigt jeden Tag um 26%.

Das Land möchte, dass sich in 30 Tagen so wenig Menschen wie möglich angesteckt haben. Deshalb wird überlegt, Massnahmen wie vermehrtes Händewaschen und Social Distancing zu ergreifen. Durch diese Massnahmen würde die Zahl der angesteckten Menschen nur um 9% pro Tag steigen.

Wie viele Ansteckungen könnten durch diese Massnahmen in den folgenden 30 Tagen vermieden werden?

#### Hinweise:

- Bei der Anzahl angesteckter Menschen zählen Sie bitte auch Genesene und Verstorbene dazu.
- Antworten Sie mit Ihrer gefühlsmässigen Einschätzung, Ihrer Intuition.

Weiter

Screenshot:

Mitigation Question in Frame A1 as displayed on a cell phone screen in the original German.
